# Supplementary material
Source: publisher site journal article supplement (https://www.dovepress.com/article/436940)
Supplement: Supplementary file 1 [file get_supplementary_file.php]

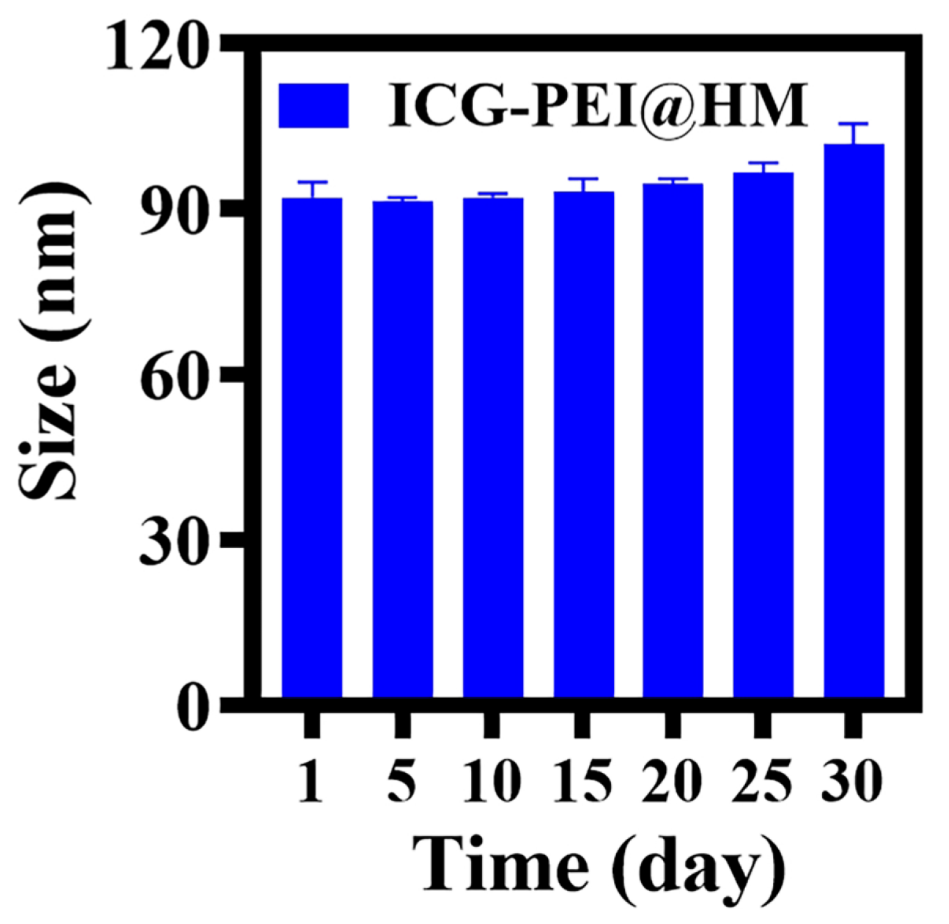


**Figure S1**. The particle size stability of ICG-PEI@HM NPs stored in PBS.


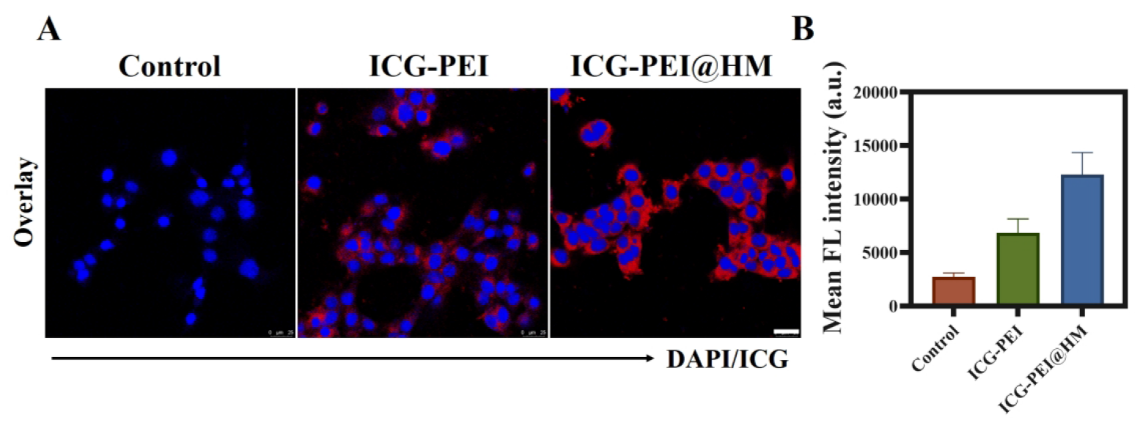


**Figure S2**. Fluorescence images (A) and flow cytometry analysis (B) of H1975 cells

after 12 h uptake of nanoparticles.


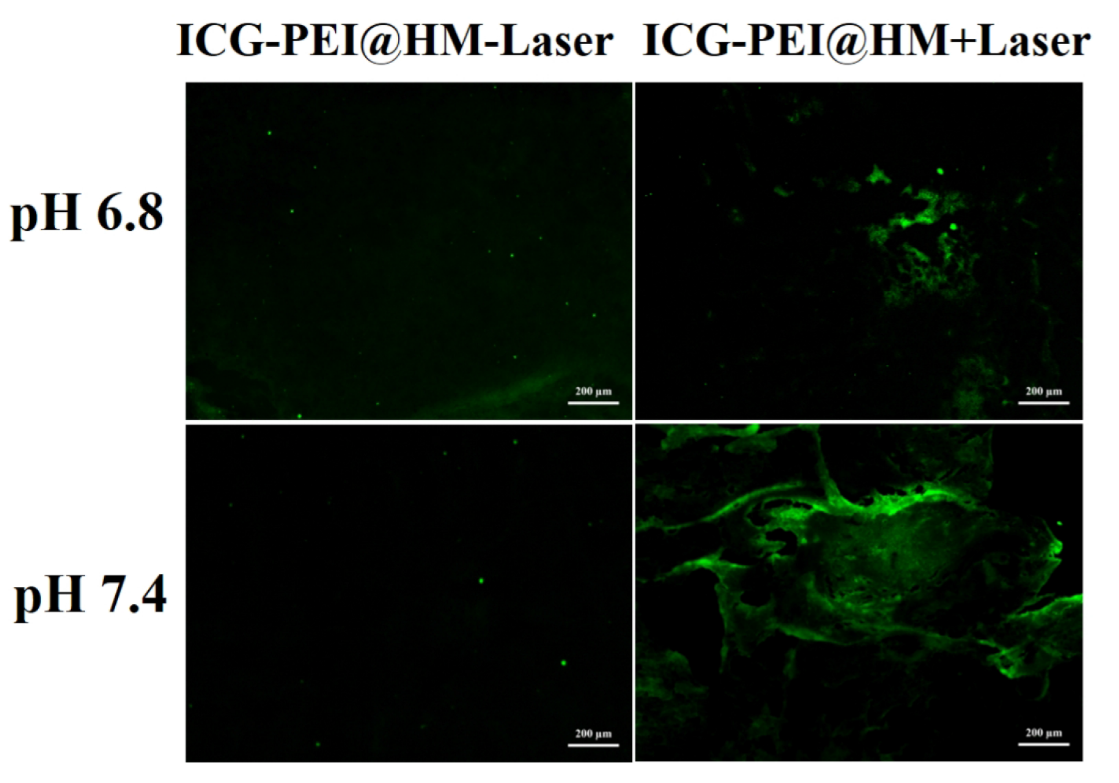


**Figure S3**. ROS levels in tumor tissue *in vivo*.


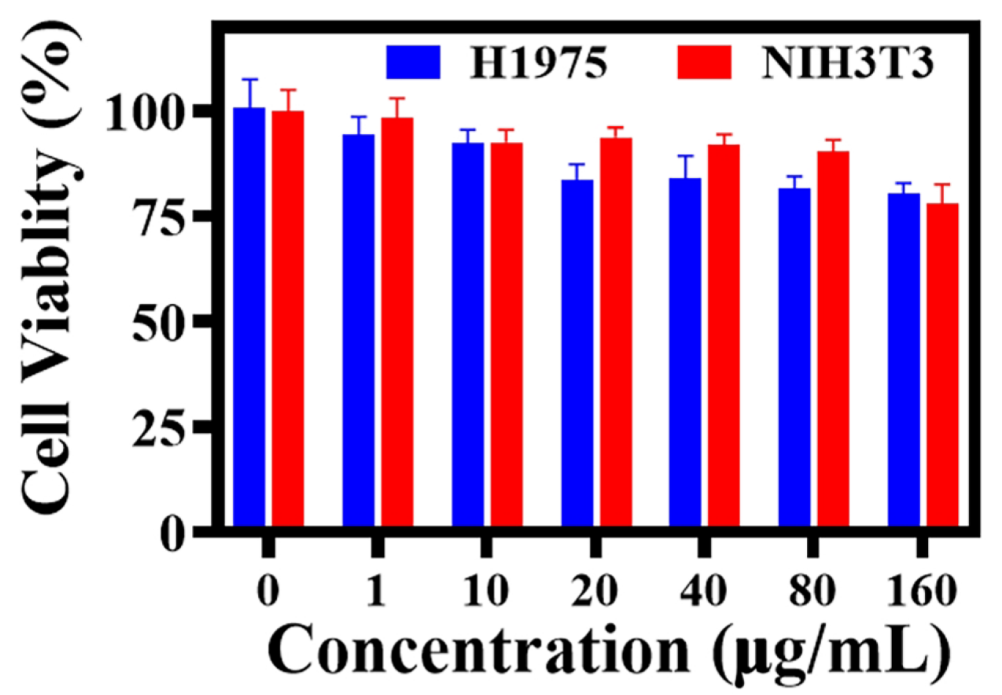


**Figure S4**. The potential toxicity exhibited by NIH-3T3 and H1975 cells treated with

ICG-PEI@HM NPs under different concentration.


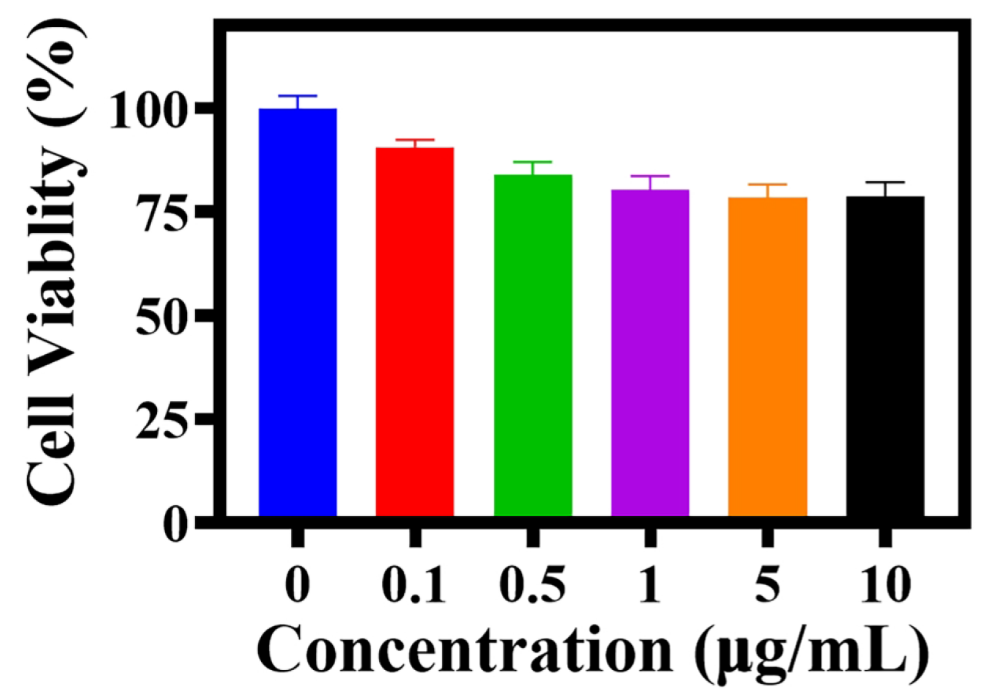


**Figure S5**. Viability of H1975 cells after treated with various concentrations of ICGPEI@HM NPs.


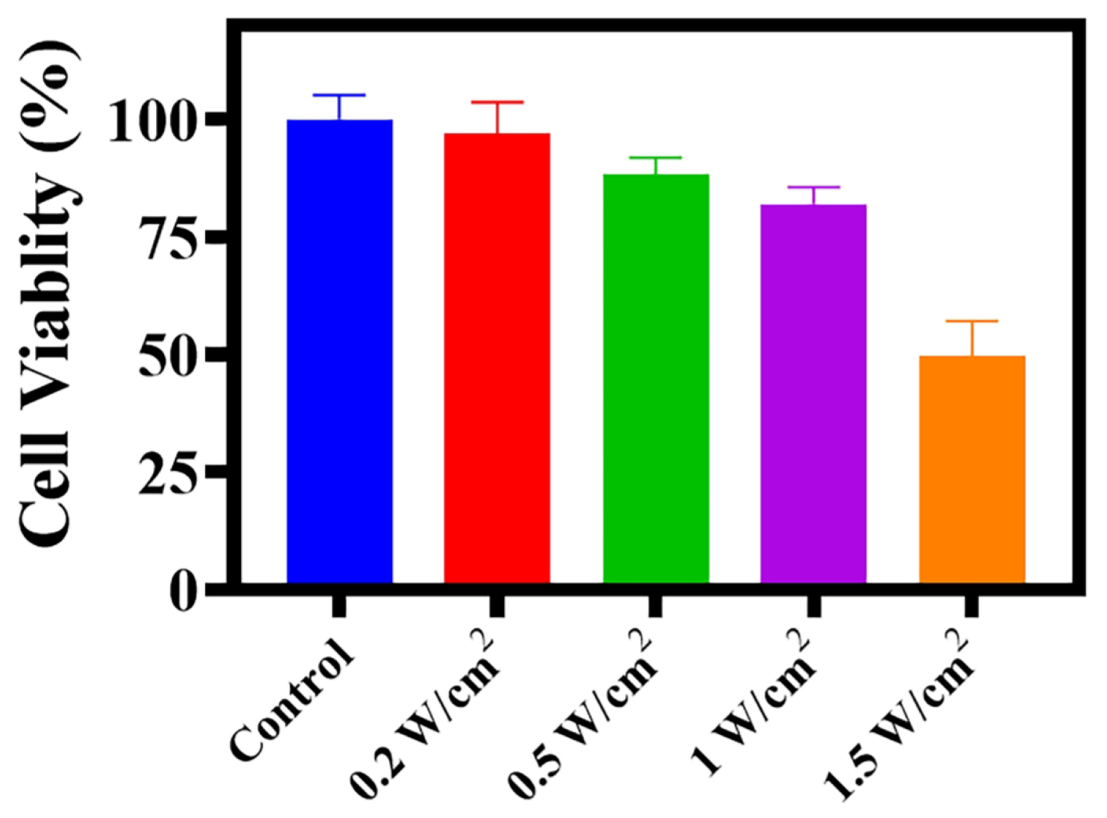


**Figure S6**. Viability of H1975 cells treated with different power irradiation.


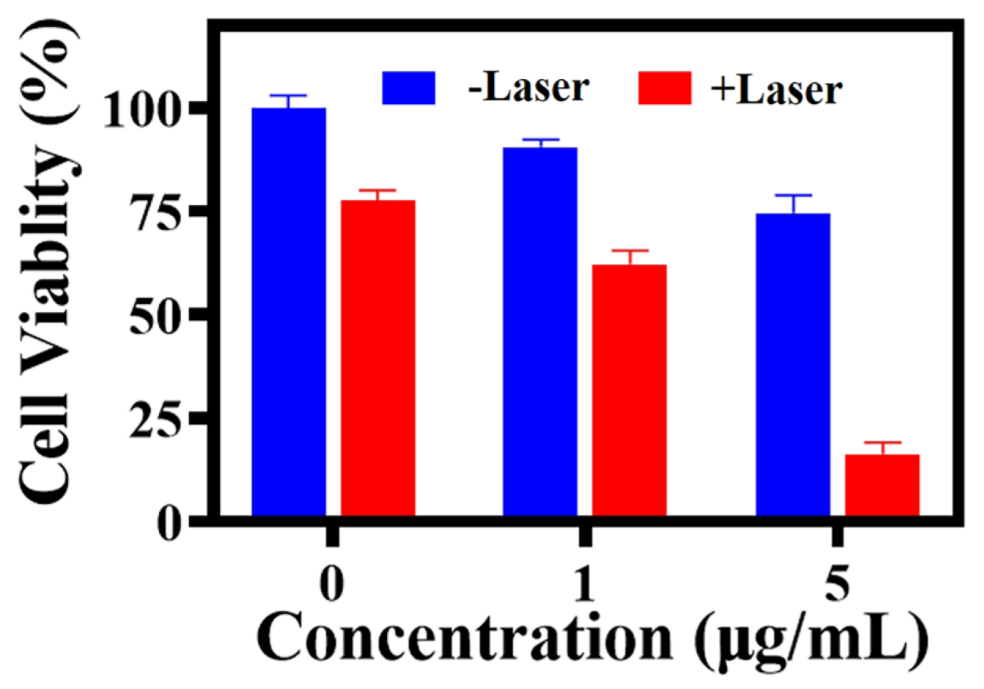


**Figure S7**. Cell viability after combined laser irradiation with ICG-PEI@HM NPs (808

nm, 10 min, 5 μg/mL).


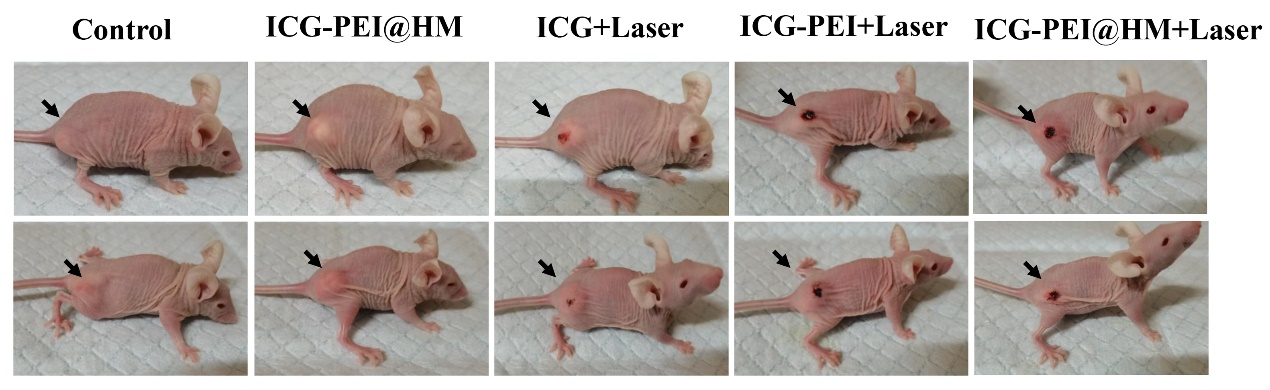


**Figure S8**. Photographs of mice after different treatments at different days. The arrow indicates the tumor.


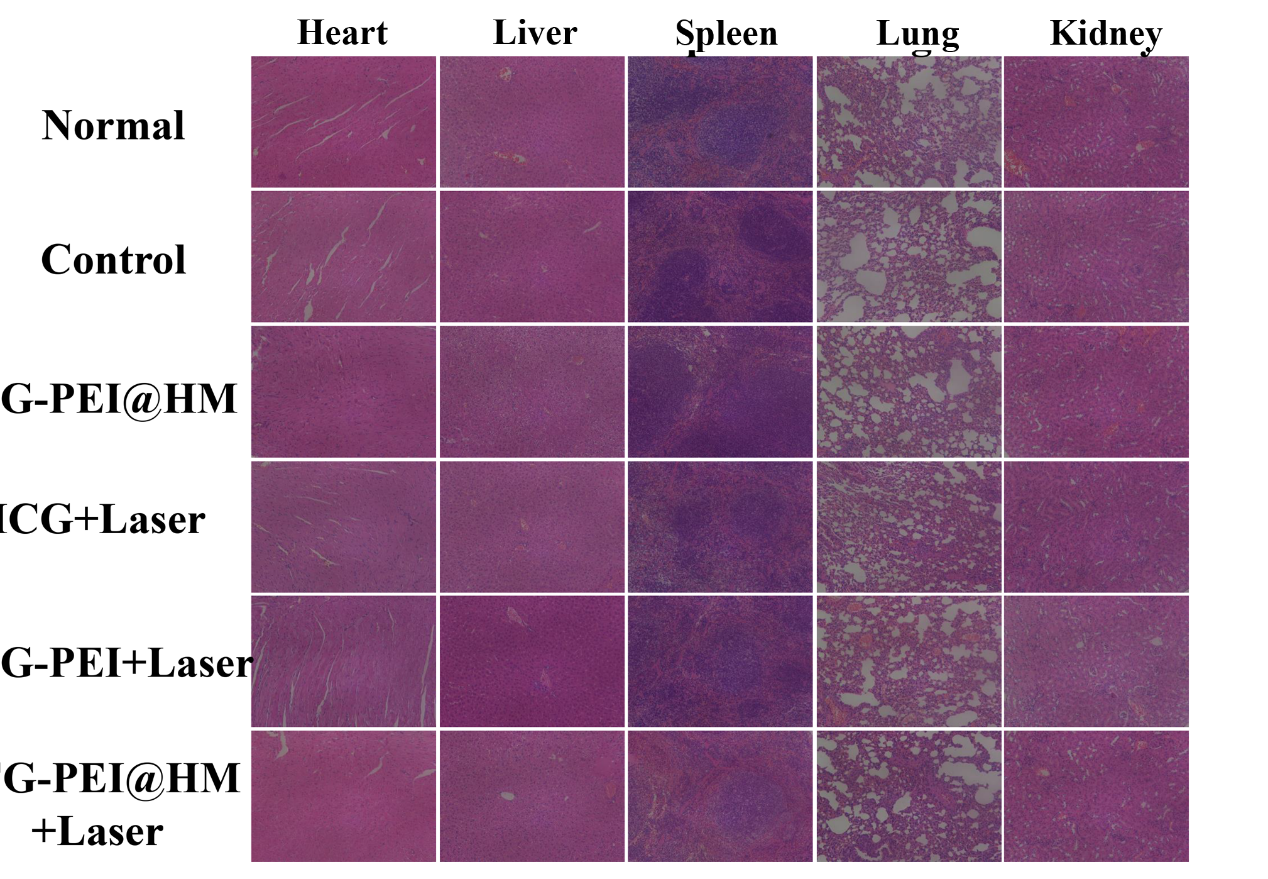


**Figure S9**. H&E analysis of main organs (Normal group represents mice without

tumors). The scale bar is 50 μm.


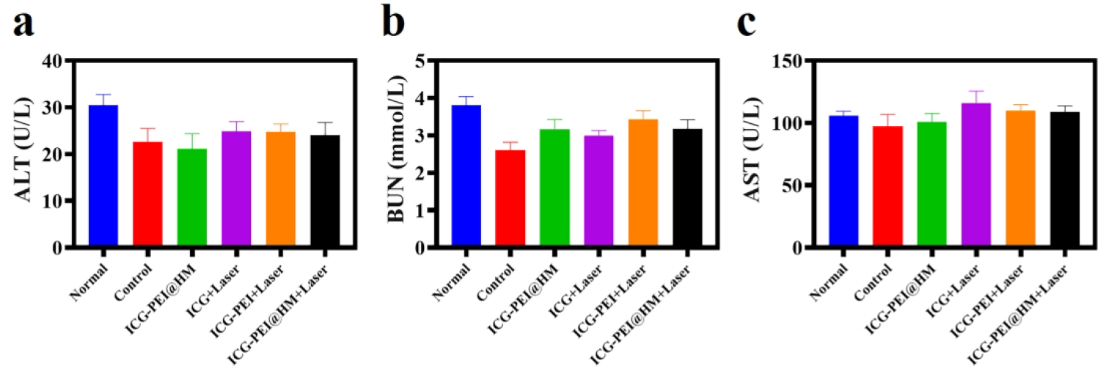


**Figure S10**. Blood routine examination was detected at the 21th day after different

treatments. AST (a), BUN (b) and AST (c) were measured.
